# Supplementary material
Source: PubMed Central journal article supplement (PMC4313802)
Supplement: pnas.201418203SI.pdf [file pnas.201418203SI.pdf]

# Supporting Information

Tian et al. 10.1073/pnas.1418203112

## SI Experimental Procedures

**Plasmid Construction.** pCMV6 plasmid was digested with NotI and SalI (New England Biolabs). Adapter primers were used to add appropriate restriction sites to clones of naked mole rat p15<sup>INK4b</sup>, p16<sup>INK4a</sup>, and pALT<sup>INK4a/b</sup> cDNA. Plasmids and inserts were ligated, subcloned, and sequenced to confirm correct construction. All plasmids used were prepared using an EndoFree Maxi kit (Qiagen).

**qRT-PCR.** RNA extraction from cell lines and tissues (brain, heart, muscle, liver, lung, spleen, kidney, and testes from a 1-y-old naked mole rat) was performed using the Qiagen RNeasy kit (cat. 74104) according to the manufacturer's instructions. RNA samples were treated with DNase I followed by heat inactivation. cDNA was synthesized by SuperScript III (Invitrogen) unless otherwise noted. RNA was heated to 80 °C for 5 min and immediately cooled on ice before RT reaction. RT reactions were all performed at 55 °C for 1 h.

qRT-PCR was performed using the FastStart SYBR Green (Rox) mix from Roche in a total volume of 25  $\mu$ L. Primers used are summarized in Table S2. Fold-differences in expression were calculated using the  $\Delta\Delta C_t$  method, with beta-actin as the reference gene.

**Cell Culture.** Naked mole rat fibroblasts were grown at 32 °C (in vivo body temperature of naked mole rat), 5% CO<sub>2</sub>, 3% O<sub>2</sub> on treated polystyrene culture dishes (Corning) in EMEM media (ATCC) supplemented with 15% (vol/vol) FBS (Gibco), 100 units/mL penicillin, and 100  $\mu$ g/mL streptomycin (Gibco). Unless otherwise indicated, all cell-culture experiments were performed in at least three primary naked mole rat skin fibroblast lines at low passage (NSF8, NSF13, NSF14, and/or NSFJ2). All of the cell lines were obtained from different naked mole rat individuals. The experiment measuring the reduction of irradiation-induced apoptosis was performed in NSF2 mut cells that spontaneously lost INK4 locus expression, the senescence response, and the ECI phenotype (1).

**Analysis of INK4 Expression in Different Growth States.** Four independent naked mole rat skin fibroblast cell lines were passaged twice at low cell density before being grown for 48 h and harvested for RNA extraction; these samples are referred to as "growing." ECI cells were achieved by passaging twice and allowing to grow on the same plate for 10–14 d until they stopped growing and exhibited the ECI phenotype. Hyaluronidase-treated cells were obtained by passaging and growing with 3 U/mL *Streptomyces hyalurolyticus* hyaluronidase (Sigma-Aldrich H1136) for 48 h. Confluent cells were cells grown with 3U/mL hyaluronidase until reaching confluence and maintained for another 48 h.

**UV Irradiation.** Naked mole rat skin fibroblasts were passaged twice after recovery from liquid nitrogen and grown for an additional 48 h. Cells were then subjected with UV-C radiation of 0, 200, 400, and 1,200 J/m<sup>2</sup>, respectively. Cells were then grown for 24 h and harvested for RNA extraction and qRT-PCR analysis.

**$\gamma$ -Irradiation-Induced Senescence.** Growing naked mole rat skin fibroblasts were treated with 20 Gy  $\gamma$ -irradiation and allowed to grow for 30 d to fully develop the senescent phenotype. Media were changed every 7 d. Senescent cells were harvested, and RNA was extracted for qRT-PCR analysis.

**Anoikis.** Growing naked mole rat skin fibroblasts were harvested, and  $2 \times 10^6$  cells were put into the plates precoated with 1% agarose for 48 h. Cells were then collected, and RNA was extracted for qRT-PCR analysis.

**Oncogene Overexpression.** Naked mole rat skin fibroblasts were transfected with pEGFP-N1 (Clontech), pHRAS V12 (Clontech), or pBRAF E600, respectively. Transfections were performed 48 h after splitting using Amaxa Nucleofector II on program U20 and solution NHDF (Lonza). Media were replaced 24 h after transfection to remove dead cells. Cells were then maintained for 10 d before harvesting for qRT-PCR analysis of INK4 locus.

**Cell-Cycle Analysis.** Naked mole rat skin fibroblasts were transfected with INK4 plasmids and were plated at a low density ( $1 \times 10^5$  cells per 10-cm plate) to avoid ECI-induced cell-cycle arrest. The overexpression level was examined by RT-PCR using a primer pair on the vector flanking the INK4 cDNA. The cells were harvested at different time points and then fixed in 70% (vol/vol) ethanol at –20 °C for 16 h. The cells were centrifuged, ethanol was decanted, and the pellet was resuspended in 1 mg/mL RNase A in PBS followed by incubating for 30 min. The cells were centrifuged again, resuspended in 20  $\mu$ g/mL propidium iodide in PBS, and stained for 10 min. Cell-cycle status was determined by flow cytometry using a FACS Canto machine with previously published parameters (2).

**Apoptosis Analysis.** NSF2 mut cells that spontaneously lost INK4 locus expression and the ECI phenotype (1) were transfected with plasmids encoding NMR INK4 proteins or a control plasmid expressing HPRT. Forty-eight hours after transfection, cells were subjected to 20 Gy  $\gamma$ -irradiation. Media were changed immediately after radiation. Four or 10 d after irradiation, cells (including the dead cells) were collected, and Annexin-V (Roche) staining was conducted to measure the cell death on a FACS Canto machine.

**RNA-seq Analysis.** Total RNA was from brain, kidney, and liver of newborn, 4-y-old, and 20-y-old NMRs, or from a pooled sample of 7 organs of a 4-y-old NMR (3). Abundance of various expressed forms derived from the INK4 locus was analyzed by BlastN using 60 nucleotide fragments corresponding to segments of p15<sup>INK4b</sup> and p16<sup>INK4a</sup> genes mapped to various RNA-seq libraries. To assess relative expression of transcripts derived from the INK4 locus, only uniquely mapped fragments corresponding to the exon 1/exon 2 junction were considered.

1. Seluanov A, et al. (2009) Hypersensitivity to contact inhibition provides a clue to cancer resistance of naked mole-rat. *Proc Natl Acad Sci USA* 106(46):19352–19357.  
2. Mao Z, Ke Z, Gorbunova V, Seluanov A (2012) Replicatively senescent cells are arrested in G1 and G2 phases. *Aging (Albany, NY Online)* 4(6):431–435.

3. Kim EB, et al. (2011) Genome sequencing reveals insights into physiology and longevity of the naked mole rat. *Nature* 479(7372):223–227.

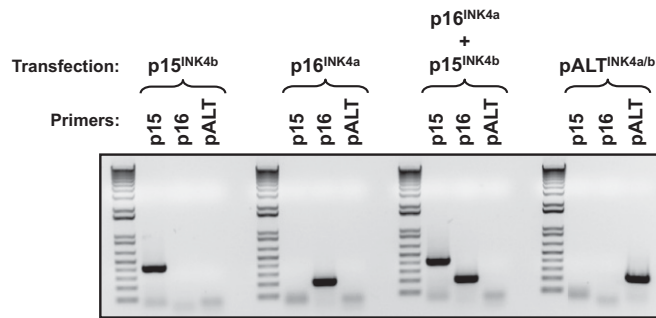

**Fig. S1.** The pALT<sup>INK4a/b</sup> product is not the result of a template switching by reverse transcriptase. Human skin fibroblasts not expressing any *INK4a/b* products were transfected with pCMV6 constructs encoding naked mole rat p15<sup>INK4b</sup>, p16<sup>INK4a</sup>, or pALT<sup>INK4a/b</sup> cDNAs. One cell line was simultaneously transfected with the INK4a and INK4b plasmids. RNA was extracted 24 h posttransfection and reverse transcribed with SuperScript III RT. Each cDNA was amplified with isoform-specific primers.

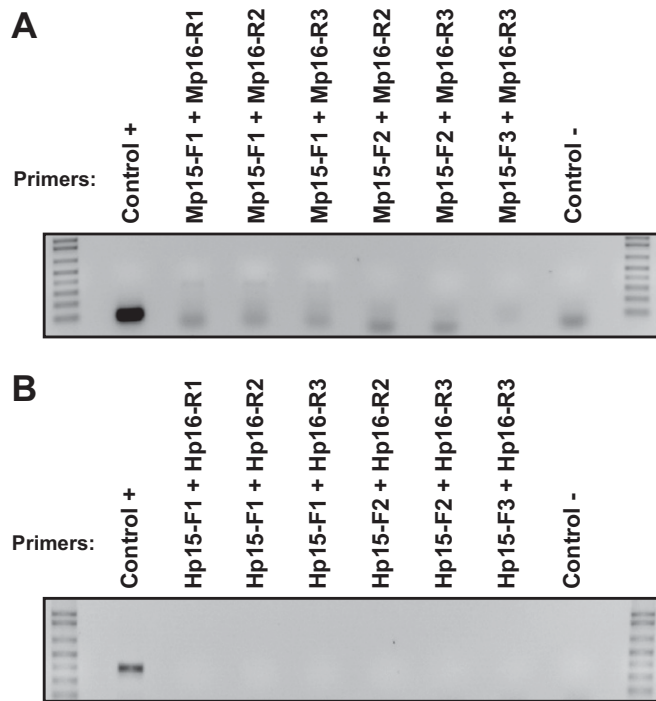

**Fig. S2.** Human and mouse cells induced to transcribe *INK4a/b* locus do not show the alternative splicing product. PCR using primers to p15 5' UTR and p16 3' UTR did not yield a similar splice isoform to that observed in the naked mole rat. Primer pairs are indicated above the gel image. (A) Mouse cDNA from cell lines irradiated with 1,200 J/cm<sup>3</sup> UV-C. The positive (+) control reaction was performed with primers to canonical mouse p16<sup>INK4a</sup>, the negative (-) control is a reaction containing no template DNA. (B) Human cDNA from senescent skin fibroblasts (population doubling >70). The positive (+) control reaction was performed with primers to canonical human p16<sup>INK4a</sup>, the negative (-) control is a reaction containing no template DNA.

**Table S1. Total numbers of unique reads from RNA-seq libraries corresponding to the junction between exon 1 and exon 2 of p15<sup>INK4b</sup>, p16<sup>INK4a</sup>, and pALT<sup>INK4a/b</sup>**

| Samples |         | No. of reads of the E1/E2 splice junction |                      |                         |
|---------|---------|-------------------------------------------|----------------------|-------------------------|
| Tissues | Age     | p15 <sup>INK4b</sup>                      | p16 <sup>INK4a</sup> | pALT <sup>INK4a/b</sup> |
| Pool*   | 4 y     | 16 (66.7%)                                | 3 (12.5%)            | 5 (20.8%)               |
| Brain   | Newborn | 0                                         | 0                    | 0                       |
|         | 4 y     | 0                                         | 10                   | 0                       |
|         | 20 y    | 4                                         | 24                   | 0                       |
| Kidney  | Newborn | 0                                         | 0                    | 0                       |
|         | 4 y     | 1                                         | 4                    | 0                       |
|         | 20 y    | 3 (27.3%)                                 | 5 (45.4%)            | 3 (27.3%)               |
| Liver   | Newborn | 0                                         | 0                    | 0                       |
|         | 4 y     | 0                                         | 0                    | 0                       |
|         | 20 y    | 1                                         | 1                    | 0                       |

\*Pooled sample of seven organs (brain, liver, kidney, spleen, heart, testis, and lung).

**Table S2. PCR primers used to amplify *INK4a/b* transcripts**

| Name*         | Sense or antisense | Sequence (5'→3')               | Specificity                                  |
|---------------|--------------------|--------------------------------|----------------------------------------------|
| NMR p15-5UTR  | S                  | CAGGAAAAGCCCGAACTAACTAC        | Specific to NMR p15 5' UTR.                  |
| NMR p15-E2    | AS                 | GCAGAAGCTCAGCCATGTGGGCAC       | Specific to NMR p15 Exon 2                   |
| NMR p16-E2    | AS                 | GGTGACAGGGTCAGCGCAGTTCG        | Specific to NMR p16 Exon 2                   |
| NMR p16-E1    | S                  | GCAGCATGGACTCGTGGGCGAAAAGCTGG  | Specific to NMR p16 E1, includes start codon |
| H p15-5UTR-F1 | S                  | TGGGAAAGAAGGGAAGAGTGTCTCGTTAAG | Human INK4b 5' UTR                           |
| H p15-5UTR-F2 | S                  | TTTTTCCCAGAAGCAATCCAGGCGC      | Human INK4b 5' UTR                           |
| H p15-5UTR-F3 | S                  | CAGGAAAAGCCCGGAGCTAACG         | Human INK4b 5' UTR                           |
| H p16-3UTR-R1 | AS                 | AGTTTCCCGAGGTTTCTCAGAGCC       | Human INK4a 3' UTR                           |
| H p16-3UTR-R2 | AS                 | AACTCCAACACAGTGAAGGAGCAGAAGC   | Human INK4a 3' UTR                           |
| H p16-3UTR-R3 | AS                 | TTTGAGCTTTGGTTCTGCCATTTGCTAGC  | Human INK4a 3' UTR                           |
| M p15-5UTR-F1 | S                  | GAACGCTGCAGCTCAGTGCCTG         | Mouse INK4b 5' UTR                           |
| M p15-5UTR-F2 | S                  | ACCGAAGCTACTGGGCTCCAGAG        | Mouse INK4b 5' UTR                           |
| M p15-5UTR-F3 | S                  | CGAAGGACCATTCTGCCACAGAC        | Mouse INK4b 5' UTR                           |
| M p16-3UTR-R1 | AS                 | GGCTGAGGCCGGATTAGCTC           | Mouse INK4a 3' UTR                           |
| M p16-3UTR-R2 | AS                 | CTCTGCTCCCTCCCGTATTGC          | Mouse INK4a 3' UTR                           |
| M p16-3UTR-R3 | AS                 | CTCATGCCATTCTTTCCTGTCC         | Mouse INK4a 3' UTR                           |

\*Letters preceding the primer name indicate the species for which INK4 loci the corresponding primers were designed: NMR, naked mole rat; H, human; M, mouse.
